# Supplementary material
Source: HighWire-hosted journal article supplement (https://bmjopen.bmj.com/content/12/1/e055570)
Supplement: inline-supplementary-material-1 [file inline-supplementary-material-1.pdf]

Endoscopic Third Ventriculostomy for Adults with Hydrocephalus: Creating a Prognostic Model for Success – Protocol for a Retrospective Multicentre Study (Nordic ETV)

## Supplementary Material 1: List of Variables

| Variable / Field name                                          | Field Label                                                                           | Field Attributes (Field Type, Validation, Choices, Calculations, etc.)                                                                                                                                                                                                                                                                         |
|----------------------------------------------------------------|---------------------------------------------------------------------------------------|------------------------------------------------------------------------------------------------------------------------------------------------------------------------------------------------------------------------------------------------------------------------------------------------------------------------------------------------|
| <b>Instrument: Data Entry Form (for local data collection)</b> |                                                                                       |                                                                                                                                                                                                                                                                                                                                                |
| record_id                                                      | Record ID                                                                             | Text                                                                                                                                                                                                                                                                                                                                           |
| location_country                                               | Country                                                                               | Radio buttons:<br>1. Norway<br>2. Sweden<br>3. Denmark<br>4. Finland                                                                                                                                                                                                                                                                           |
| location_no                                                    | Where in Norway was the ETV performed?                                                | Radio buttons:<br>1. Bergen<br>2. Oslo – Ullevål<br>3. Oslo – Rikshospitalet<br>4. Tromsø<br>5. Trondheim                                                                                                                                                                                                                                      |
| location_swe                                                   | Where in Sweden was the ETV performed?                                                | Radio buttons:<br>1. Stockholm<br>2. Lund<br>3. Linköping<br>4. Gothenburg<br>5. Uppsala<br>6. Umeå                                                                                                                                                                                                                                            |
| location_dk                                                    | Where in Denmark was the ETV performed?                                               | Radio buttons:<br>1. Copenhagen<br>2. Odense<br>3. Århus<br>4. Ålborg                                                                                                                                                                                                                                                                          |
| location_fin                                                   | Where in Finland was the ETV performed?                                               | Radio buttons:<br>1. Helsinki<br>2. Tampere<br>3. Kuopio<br>4. Turku<br>5. Oulu                                                                                                                                                                                                                                                                |
| date_of_birth                                                  | Date of Birth                                                                         | Date                                                                                                                                                                                                                                                                                                                                           |
| sex                                                            | Sex                                                                                   | Radio buttons:<br>1. Female<br>2. Male                                                                                                                                                                                                                                                                                                         |
| <b>History and Aetiology</b>                                   |                                                                                       |                                                                                                                                                                                                                                                                                                                                                |
| patient_group                                                  | Patient group - Estimated or defined time of hydrocephalus onset, in relation to age. | 1. Child - diagnosed during childhood with congenital or early acquired hydrocephalus<br>2. Adult - diagnosed during childhood with congenital or early acquired hydrocephalus<br>3. Adult - diagnosed as an adult, presumably with a congenital or early acquired hydrocephalus<br>4. Adult diagnosed as an adult with acquired hydrocephalus |
| aetiol                                                         | Aetiology of hydrocephalus                                                            | 1. Non-traumatic haemorrhage<br>2. Infection<br>3. Neoplasm or cyst<br>4. Trauma<br>5. Malformation<br>6. Other                                                                                                                                                                                                                                |
| aetiol_haem                                                    | What type of haemorrhage? (If haemorrhagic aetiology)                                 | 1. SAH<br>2. IVH<br>99. Other                                                                                                                                                                                                                                                                                                                  |
| aetiol_infect                                                  | What type of infection? (If infectious aetiology)                                     | 1. Meningitis<br>2. Abscess<br>99. Other                                                                                                                                                                                                                                                                                                       |
| aetiol_tumour                                                  | Where is the tumour located? (If tumoural aetiology)                                  | 1. Third ventricle<br>2. Fourth ventricle<br>3. Cerebellum<br>4. Cerebellopontine angle<br>5. Tectal plate tumour<br>6. Pineal tumour<br>99. Other                                                                                                                                                                                             |
| aetiol_trauma                                                  | Type of traumatic lesion? (If traumatic aetiology)                                    | Checkbox:<br>1. aetiol_trauma__1 Contusions<br>2. aetiol_trauma__2 Traumatic SAH<br>3. aetiol_trauma__3 SDH                                                                                                                                                                                                                                    |

## Endoscopic Third Ventriculostomy for Adults with Hydrocephalus: Creating a Prognostic Model for Success – Protocol for a Retrospective Multicentre Study (Nordic ETV)

|                             |                                                                                                             |                                                                                                                                                                                                                                                                                                   |
|-----------------------------|-------------------------------------------------------------------------------------------------------------|---------------------------------------------------------------------------------------------------------------------------------------------------------------------------------------------------------------------------------------------------------------------------------------------------|
|                             |                                                                                                             | 4. aetiol_trauma__4 IVH<br>5. aetiol_trauma__5 DAI<br>99. aetiol_trauma__99 Other                                                                                                                                                                                                                 |
| aetiol_cong                 | What type of malformation?<br>(If congenital or early acquired aetiology)                                   | Radio buttons:<br>1. Aqueductal stenosis<br>2. Chiari malformation<br>3. Dandy-Walker malformation<br>4. LOVA<br>99. Other                                                                                                                                                                        |
| aetiol_idio                 | Diagnosis? (If other aetiology)                                                                             | Radio buttons:<br>1. iNPH<br>2. IIH<br>99. Other                                                                                                                                                                                                                                                  |
| aetiol_other                | Other aetiology                                                                                             | Text                                                                                                                                                                                                                                                                                              |
| <b>Radiology</b>            |                                                                                                             |                                                                                                                                                                                                                                                                                                   |
| visible_obstruct            | Documented obstruction? In radiologists description                                                         | Yes/No                                                                                                                                                                                                                                                                                            |
| visible_obstruct_loc        | Where was the obstruction?                                                                                  | Radio buttons:<br>1. Foramen monroi<br>2. Third ventricle<br>3. Aqueductus sylvii<br>4. Fourth ventricle<br>99. Other extraventricular obstruction                                                                                                                                                |
| visible_obstruct_loc_o ther | Describe the location of the obstruction.<br>If other obstruction.                                          | Text                                                                                                                                                                                                                                                                                              |
| sagittal_upload             | Upload mid-sagittal image                                                                                   | File                                                                                                                                                                                                                                                                                              |
| axial_upload                | Upload axial image at the level of the frontal horns widest point                                           | File                                                                                                                                                                                                                                                                                              |
| coronal_upload              | Upload coronal image at the level of the posterior commissure                                               | File                                                                                                                                                                                                                                                                                              |
| <b>Symptoms</b>             |                                                                                                             |                                                                                                                                                                                                                                                                                                   |
| symptoms                    | Preoperative symptoms                                                                                       | checkbox<br>1. symptoms__1 Headache<br>2. symptoms__2 Nausea/Vomiting<br>3. symptoms__3 Dizziness<br>4. symptoms__4 Visual symptoms<br>5. symptoms__5 GCS < 15<br>6. symptoms__6 Cognitive Decline<br>7. symptoms__7 Gait Imparement<br>8. symptoms__8 Urinary Problems<br>99. symptoms__99 Other |
| gcseye                      | GCS: Eye opening                                                                                            | Text                                                                                                                                                                                                                                                                                              |
| gcsverbal                   | GCS: Verbal response                                                                                        | Text                                                                                                                                                                                                                                                                                              |
| gcsmotor                    | GCS: Motor response                                                                                         | Text                                                                                                                                                                                                                                                                                              |
| gcs                         | Preoperative GCS score                                                                                      | Text                                                                                                                                                                                                                                                                                              |
| symptoms_other              | Other symptoms                                                                                              | Text                                                                                                                                                                                                                                                                                              |
| <b>Shunt History</b>        |                                                                                                             |                                                                                                                                                                                                                                                                                                   |
| shunt                       | Previous shunt treatment                                                                                    | Yes/No                                                                                                                                                                                                                                                                                            |
| shunt_year                  | Year of first shunt procedure?                                                                              | Text (integer)                                                                                                                                                                                                                                                                                    |
| shunt_failure               | Cause of shunt failure? Reason for shunt dysfunction leading up to ETV.                                     | Radio buttons<br>1. Obstruction<br>2. Infection<br>3. Overdrainage<br>4. Disconnection<br>99. Other                                                                                                                                                                                               |
| shunt_failure_other         | Other cause of shunt failure                                                                                | Text                                                                                                                                                                                                                                                                                              |
| shunt_revision              | Previous shunt revisions Check "Yes" if the patient has had one or more shunt revisions prior to their ETV. | Yes/No                                                                                                                                                                                                                                                                                            |
| shunt_revision_nr           | Number of revisions                                                                                         | 1. 1<br>2. 2-5<br>3. 6-10<br>4. 11-20<br>5. >20<br>88. Not reported                                                                                                                                                                                                                               |
| <b>ETV Procedure</b>        |                                                                                                             |                                                                                                                                                                                                                                                                                                   |
| etv_date                    | Date of ETV procedure                                                                                       | Date                                                                                                                                                                                                                                                                                              |
| etv_age_calc                | Calculated age at ETV Procedure                                                                             | Calculation: rounddown(datediff ([date_of_birth], [etv_date], "y", "dmy"),0)                                                                                                                                                                                                                      |
| perop_obs                   | Peroperative observations                                                                                   | Checkbox:<br>1. perop_obs__1 Opaque floor of the third ventricle                                                                                                                                                                                                                                  |

## Endoscopic Third Ventriculostomy for Adults with Hydrocephalus: Creating a Prognostic Model for Success – Protocol for a Retrospective Multicentre Study (Nordic ETV)

|                                    |                                                                                                                                             |                                                                                                                                                                                                                                                                                                                                                                  |
|------------------------------------|---------------------------------------------------------------------------------------------------------------------------------------------|------------------------------------------------------------------------------------------------------------------------------------------------------------------------------------------------------------------------------------------------------------------------------------------------------------------------------------------------------------------|
|                                    |                                                                                                                                             | 2. perop_obs__2 Preopontine membranes<br>3. perop_obs__3 Pulsations of the stoma<br>77. perop_obs__77 None<br>88. perop_obs__88 Not reported<br>99. perop_obs__99 Other                                                                                                                                                                                          |
| perop_obs_other                    | Other peroperative observations                                                                                                             |                                                                                                                                                                                                                                                                                                                                                                  |
| procedures                         | Was any of the following procedures performed at the time of ETV?                                                                           | Checkbox:<br>1. procedures__1 Tumor biopsy<br>2. procedures__2 External ventricular drain (EVD)<br>3. procedures__3 Stent (in third ventricle floor or the aqueduct)<br>4. procedures__4 Shunt<br>5. procedures__5 ICP monitoring probe<br>6. procedures__6 Fenestration of preopontine membranes<br>88. procedures__88 Not reported<br>99. procedures__99 Other |
| other_procedures                   | What other procedures?                                                                                                                      | Text                                                                                                                                                                                                                                                                                                                                                             |
| shunt_handling                     | How was the existing shunt handled?                                                                                                         | Checkbox<br>shunt_handling__1 Removed during same procedure.<br>shunt_handling__2 Removed prior to ETV procedure.<br>shunt_handling__3 Left in situ.<br>shunt_handling__4 Ligated and left in situ.<br>shunt_handling__5 Ligated and removed ventricular drain.<br>shunt_handling__88 Not reported<br>shunt_handling__99 Other                                   |
| shunt_handling_other               | Please specify how the existing shunt was handled                                                                                           | Text                                                                                                                                                                                                                                                                                                                                                             |
| re_proced                          | Subsequent CSF-diversion procedure                                                                                                          | Radio buttons:<br>1. None<br>2. Shunt treatment<br>3. Repeat ETV                                                                                                                                                                                                                                                                                                 |
| re_procedure_date                  | Date of second procedure                                                                                                                    | Date                                                                                                                                                                                                                                                                                                                                                             |
| re_procedure_time_calc             | Calculated time between first and second procedure (months)                                                                                 | Calculation: round(datediff([etv_date], [re_procedure_date], "M", "dmy"),2)                                                                                                                                                                                                                                                                                      |
| improvement_re_etv                 | Clinical state at first follow up after reETV? If there is any doubt if the patient has improved or not at follow up select "Not improved". | Radio buttons:<br>1. Improved<br>2. Not improved                                                                                                                                                                                                                                                                                                                 |
| re_proced_2                        | Subsequent CSF-diversion procedure                                                                                                          | Radio buttons:<br>4. None<br>5. Shunt treatment<br>6. Repeat ETV                                                                                                                                                                                                                                                                                                 |
| <b>Complications and Mortality</b> |                                                                                                                                             |                                                                                                                                                                                                                                                                                                                                                                  |
| compl                              | Complications                                                                                                                               | Yes/No                                                                                                                                                                                                                                                                                                                                                           |
| intraop_compl                      | Perioperative complications                                                                                                                 | Checkbox:<br>1. intraop_compl__1 Haemorrhage<br>2. intraop_compl__2 Structural lesion<br>99. intraop_compl__99 Other                                                                                                                                                                                                                                             |
| postop_compl                       | Postoperative complications                                                                                                                 | Checkbox:<br>1. postop_compl__1 Intracranial haematoma (EDH or SDH)<br>2. postop_compl__2 Wound infection<br>3. postop_compl__3 CNS infection<br>4. postop_compl__4 CSF leak<br>5. postop_compl__5 Thromboembolic (DVT or PE)<br>6. postop_compl__6 Sepsis<br>99. postop_compl__99 Other                                                                         |
| compl_other                        | Other complications                                                                                                                         | Text                                                                                                                                                                                                                                                                                                                                                             |
| discharge_date                     | Date of discharge from a neurosurgical or neurological department.                                                                          | Date                                                                                                                                                                                                                                                                                                                                                             |
| length_of_stay                     | length_of_stay                                                                                                                              | Calculation: rounddown(datediff([etv_date], [discharge_date], "d", "dmy"),0)                                                                                                                                                                                                                                                                                     |
| morbidity                          | Permanent morbidity. Did the patient suffer permanent morbidity in relation to the procedure?                                               | Yes/No                                                                                                                                                                                                                                                                                                                                                           |
| morbidity_describe                 | What kind of morbidity? Describe the nature of the permanent deficits.                                                                      | Text                                                                                                                                                                                                                                                                                                                                                             |
| mors                               | Procedure related mortality. Did the patient die in relation to the ETV procedure?                                                          | Yes/No                                                                                                                                                                                                                                                                                                                                                           |

## Endoscopic Third Ventriculostomy for Adults with Hydrocephalus: Creating a Prognostic Model for Success – Protocol for a Retrospective Multicentre Study (Nordic ETV)

|                          |                                                                                                                                                                  |                                                                                 |
|--------------------------|------------------------------------------------------------------------------------------------------------------------------------------------------------------|---------------------------------------------------------------------------------|
| mors_date                | When did the patient die?                                                                                                                                        | Date                                                                            |
| mors_cause               | How did the patient die?<br>Describe the cause and time of death, in relation to the procedure.                                                                  | Text                                                                            |
| <b>Follow-Up</b>         |                                                                                                                                                                  |                                                                                 |
| first_follow_up_date     | Date of first follow-up?                                                                                                                                         | Date                                                                            |
| first_follow_up_calc     | Calculated time to first follow-up (months)                                                                                                                      | Calculation: round(datediff([etv_date], [first_follow_up_date], "M", "dmy"),2)  |
| clinical_state_follow_up | Clinical state at first follow up?<br>If there is any doubt if the patient has improved or not at follow up select "Not improved".                               | Radio buttons<br>1. Improved<br>2. Not improved                                 |
| success                  | Was the ETV procedure a success or failure?                                                                                                                      | Radio buttons<br>1. Success<br>0. Failure                                       |
| recent_follow_up_date    | Most recent follow-up date ETV<br>Success: Set the date to most recent follow up.<br>ETV failure: Set the date to when it was realized the ETV was unsuccessful. | Date                                                                            |
| recent_follow_up_calc    | Calculated follow up duration (months)                                                                                                                           | Calculation: round(datediff([etv_date], [recent_follow_up_date], "M", "dmy"),2) |

| Variable / Field name                                                             | Field Label                                       | Field Attributes (Field Type, Validation, Choices, Calculations, etc.) |
|-----------------------------------------------------------------------------------|---------------------------------------------------|------------------------------------------------------------------------|
| <b>Instrument: Radiological Measurements (completed based on uploaded images)</b> |                                                   |                                                                        |
| callosal_angle                                                                    | Callosal angle                                    | Text                                                                   |
| temporal_horns                                                                    | Dilated temporal horns                            | Yes/No                                                                 |
| third_ventricle_bow                                                               | Downward bowing of third ventricle floor?         | Yes/No                                                                 |
| recesses                                                                          | Ballooning of the recesses of the third ventricle | Yes/No                                                                 |
| corpus_callosum                                                                   | Thinned and/or elevated corpus callosum           | Yes/No                                                                 |
| dilated_aqueduct                                                                  | Dilated aqueduct                                  | Yes/No                                                                 |
| radiol_obstruct_sign_other                                                        | What other radiological signs are present?        | Text                                                                   |
